# Supplementary material
Source: PubMed Central journal article supplement (PMC9299104)
Supplement: MMI-116-1476-s001.pdf [file MMI-116-1476-s001.pdf]

## Contribution of Classical Complement Activation and IgM to the Control of *Rickettsia* Infection

<sup>1</sup> Department of Veterinary Medicine, University of Maryland-College Park, College Park, Maryland, USA.

<sup>2</sup> Virginia-Maryland College of Veterinary Medicine, College Park, Maryland, USA.

Mustapha Dahmani<sup>1,2</sup>, Jack H. Cook<sup>1,2</sup>, Jinyi C. Zhu<sup>1,2</sup>, Sean P. Riley<sup>1,2</sup>

### SUPPLEMENTAL DATA

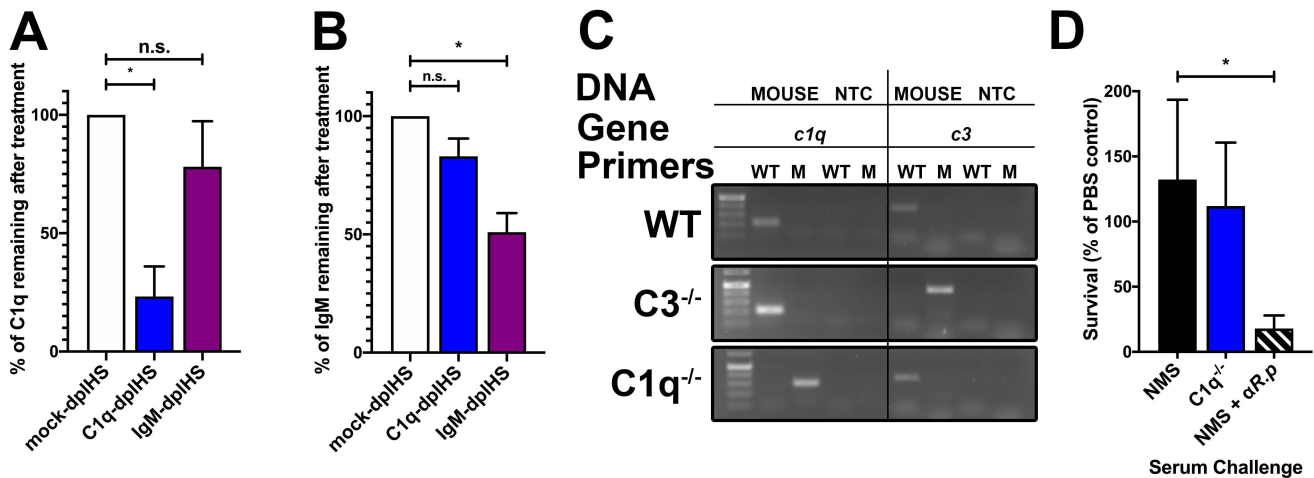

Figure S1 (A) Densitometric analysis of anti-C1q western blots to determine depletion of C1q protein in C1q-dpIHS and IgM-dpIHS as compared to mock-dpIHS. \*  $p < 0.05$  by 1 way ANOVA with multiple comparison to mock-dpIHS control. (B) Densitometric analysis of anti-IgM western blots to determine depletion of IgM protein in C1q-dpIHS and IgM-dpIHS as compared to mock-dpIHS. \*  $p < 0.05$  by 1 way ANOVA with multiple comparison to mock-dpIHS control. (C) Genotype analysis of WT, C3<sup>-/-</sup>, and C1q<sup>-/-</sup> mice. Using (from top) mouse DNA or no template control (NTC); primer sets for the *c3* or *c1q* gene; with primer sets for the wild type (WT) or mutant (M) allele. C3<sup>-/-</sup> are homozygous for the *c3* mutant allele and C1q<sup>-/-</sup> are homozygous for the *c1q* mutant allele. (D) *In vitro* evaluation of complement-mediated killing of *R. parkeri* by incubation of  $3 \times 10^6$  of the bacteria in normal mouse serum (NMS, black), C1q<sup>-/-</sup> mouse serum (blue), and NMS plus anti-*R. parkeri* antibody (NMS + αRp, striped). \*  $p < 0.05$  by unpaired t test.
